# Supplementary material
Source: PubMed Central journal article supplement (PMC6512984)
Supplement: NIHMS1510250-supplement-1.pdf [file NIHMS1510250-supplement-1.pdf]

# Development of Amygdala Functional Connectivity During Infancy and Its Relationship with 4-year Behavioral Outcomes

## *Supplemental Information*

### Table of Contents

|                                                                                        |       |
|----------------------------------------------------------------------------------------|-------|
| Image preprocessing                                                                    | 2     |
| Network-level analysis and resting-state network (RSN) definition ( <b>Figure S1</b> ) | 3     |
| Behavioral assessment information and subject breakdown ( <b>Table S1</b> )            | 4-6   |
| Left versus right amygdala functional connectivity ( <b>Figure S2</b> )                | 7     |
| Sex-effects ( <b>Figure S3</b> )                                                       | 8-9   |
| Automated-anatomical labeling (AAL) atlas regions and labels ( <b>Table S2</b> )       | 10    |
| Summary of regional cross-sectional and longitudinal effects ( <b>Tables S3-6</b> )    | 11-14 |
| Summary of regional 4YR-ANX effects co-varying for 4YR-IQ ( <b>Table S7</b> )          | 15    |
| Summary of all regional 4YR-ANX and 4YR-ISC effects ( <b>Table S8</b> )                | 15    |
| Summary of all 4YR-IQ effects ( <b>Table S9</b> )                                      | 16    |
| Summary of network-level brain behavior relationships ( <b>Table S10</b> )             | 16    |
| References                                                                             | 17    |

**Image Preprocessing.** Functional data were preprocessed using the FMRIB Software Library (FSL v5.0.8; (1)) and the Analysis of Functional NeuroImages suite (AFNI v16.0.10 2-25-2016; (2)). Steps included discarding the first 10 volumes, slice-timing correction, rigid-body motion correction, bandpass filtering (0.01– 0.08 Hz), and regression of white matter (WM), cerebral spinal fluid (CSF), and whole-brain (i.e. the global) signals, as well as the six parameters corresponding to rigid-body motion correction. Data scrubbing included 0.5% signal change and 0.5 mm frame-wise displacement (3). Subjects with less than 3 minutes of data were excluded (N = 11). For each subject we also computed an overall motion parameter; the residual frame-wise displacement (rFD) divided by the total number of volumes post-scrubbing. Spatial normalization was achieved using a two-step approach; 1) subject-specific linear (FSL flirt) plus age-specific non-linear (FSL FNIRT) warping and, 2) between-age-group linear transformations. Publicly available infant templates were used for age-specific registration (4). The 2-year template served as the final target for spatial normalization. Functional connectivity analyses were conducted in age-specific space; however, the resulting measures were subsequently aligned to the 2-year template space for cross-sectional and longitudinal functional connectivity analyses. The between age-group transformations (i.e. NEO-to-1YR-to-2YR) were computed using the segmented template images (cost function = normalized mutual information, 12 degrees-of-freedom).

**Network-level analysis.** The network-level FC analyses were based on adult canonical resting-state networks (RSNs) (5). The non-cerebellum RSNs were warped into infant space using established methodology (4). Briefly, the MNI152 template was aligned to the 2-year infant template using segmented images and nonlinear registration (6). The resulting deformation field was then applied to the RSNs. Once warped, RSN masks were created using a Z-threshold = 5 (**Figure S1**).

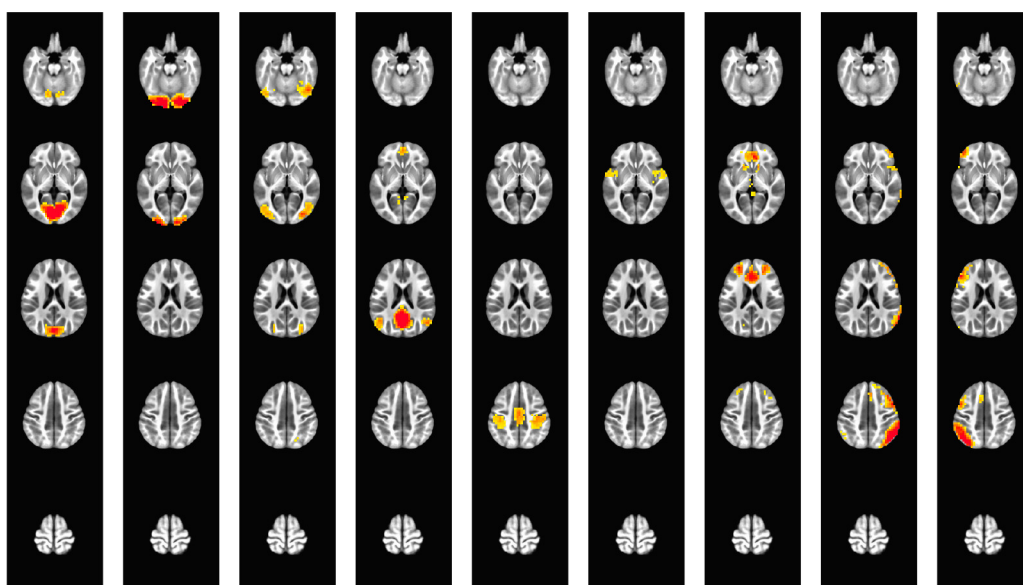

**Figure S1. Smith resting-state networks (RSNs) warped into 2YR UNC template space.** RSNs used in network-level analyses. Left-to-right: primary visual ( $V_a$ ), middle visual ( $V_b$ ), lateral visual ( $V_c$ ), default-mode network (DMN), sensorimotor (SM), auditory (AUD), salience (SAL), and right/left executive control (CON-R/L).

## **Behavioral Assessment Information**

**Emotional and cognitive assessment at 4 years of age.** We obtained both parent-reported and task-based laboratory assessments of children's behaviors at 4 years. The primary emotion-related outcome variables were ratings of anxiety and emotional/self-control assessed using Behavior Assessment System for Children – 2nd edition (BASC-2; (7)) and Behavior Rating Inventory of Executive Function – Preschool version (BRIEF-P; (8)), respectively. Moreover, 4-year IQ was also assessed using Stanford-Binet Intelligence Scales – 5th edition as an index of cognitive development (9).

**Behavior Assessment System for Children – 2nd edition (BASC-2).** Parents completed the preschool (ages 2-5 years) version of the BASC-2, rating each of 134 items based on a four-point scale (never, sometimes, often, almost always). The BASC-2 parent-report preschool form generates 12 clinical scales which comprise 4 composite scales. For each scale, item scores are summed and converted to T scores standardized by age and sex. The Anxiety scale used in this study includes 13 items that describe behavior such as worry or fear about real or imagined problems. A T-score of 60 or greater indicates that a child is “at risk,” and 70 or greater is considered “clinically significant.” A high score on the Anxiety scale by itself is generally not sufficient for the diagnosis of an anxiety disorder, but elevated anxiety levels as reported on the BASC-2 may be related to the manifestation of any number of other disorders. Here 16 subjects were at risk and 5 reached potential clinical significance. The Anxiety scale has strong test-retest reliability

( $r = .78$ ) and internal consistency ( $\alpha = .81$ ). Higher scores represent more problematic behaviors.

**Behavior Rating Inventory of Executive Function – Preschool version (BRIEF-P).**

The BRIEF-P is a 63-item parent-report inventory designed to measure executive function behaviors in children aged 2-5 years. Parents rate children on a three-point scale (never, sometimes, often), and scores are summed to generate five subscales. These subscales combine to create three indices and a global composite, all of which are converted to T-scores standardized by age and sex. This study utilizes the Inhibitory Self-Control Index (ISCI), which is comprised of the Inhibit and Emotional Control subscales. This scale measures a child's ability to regulate behavioral and emotional responses across different situations. These behaviors are crucial for developing self-regulation and metacognition. Scores may not be indicative of absolute levels of abilities, as they reflect a child's behaviors relative parent's or caregiver's expectations. A T-score of 65 or higher on any of the BRIEF-P scales is indicative of "potential clinical significance"; thirteen ( $N = 13$ ) subjects had ISCI scores falling in this range. The ISCI has strong test-retest reliability ( $r = .90$ ) and internal consistency ( $\alpha = .92$ ). Higher scores on this scale represent higher degrees of executive function difficulties.

**Stanford-Binet Intelligence Scales – 5th edition.** The Stanford-Binet is a series of tasks administered individually in a structured setting. These scales were designed to assess intelligence across the lifespan (it is appropriate for individuals aged 2 through 85 years), specifically focusing on five major domains. In the current study, the Abbreviated IQ

(ABIQ) score was used as a measure of general cognitive ability. This IQ score is calculated from performance on two routing subtests: a nonverbal test involving object or sequence/pattern recognition and a verbal test of vocabulary. The Abbreviated IQ score provides a quick estimate of a child's general cognitive ability, and as it requires the administration of only two subtests, it is easier to obtain than the full-scale IQ, especially for 4-year-old children. The ABIQ score has shown strong test-retest ( $r = .87$ ) reliability. The Stanford-Binet scales also have strong interrater reliability (ranging from .74-.97 across all scales).

**Table S1: Breakdown of behavioral measurements.**

| Time-point             |     |     | Behavioral Measure |         |        |
|------------------------|-----|-----|--------------------|---------|--------|
| NEO                    | 1YR | 2YR | 4YR-ANX            | 4YR-ISC | 4YR-IQ |
| 0                      | 0   | 1   | 15                 | 16      | 16     |
| 0                      | 1   | 0   | 16                 | 16      | 17     |
| 0                      | 1   | 1   | 15                 | 15      | 15     |
| 1                      | 0   | 0   | 36                 | 36      | 36     |
| 1                      | 0   | 1   | 5                  | 5       | 5      |
| 1                      | 1   | 0   | 18                 | 18      | 20     |
| 1                      | 1   | 1   | 20                 | 20      | 20     |
| <b>Model Type</b>      |     |     |                    |         |        |
| <i>Cross-sectional</i> |     |     |                    |         |        |
| NEO                    |     |     | 79                 | 79      | 81     |
| 1YR                    |     |     | 69                 | 69      | 72     |
| 2YR                    |     |     | 55                 | 56      | 56     |
| <i>Longitudinal</i>    |     |     |                    |         |        |
| NEO→1YR                |     |     | 110                | 110     | 113    |
| 1YR→2YR                |     |     | 89                 | 90      | 93     |

**Left versus right amygdala FC.** Similarities and differences in FC between the left and right amygdala growth patterns were further evaluated by performing a simple union analysis of significant clusters detected for each longitudinal model (NEO→1YR & 1YR→2YR) and direction of growth [positive and negative, i.e.  $\pm \beta \cdot \log(\text{age})$ ] – **Figure S2.**

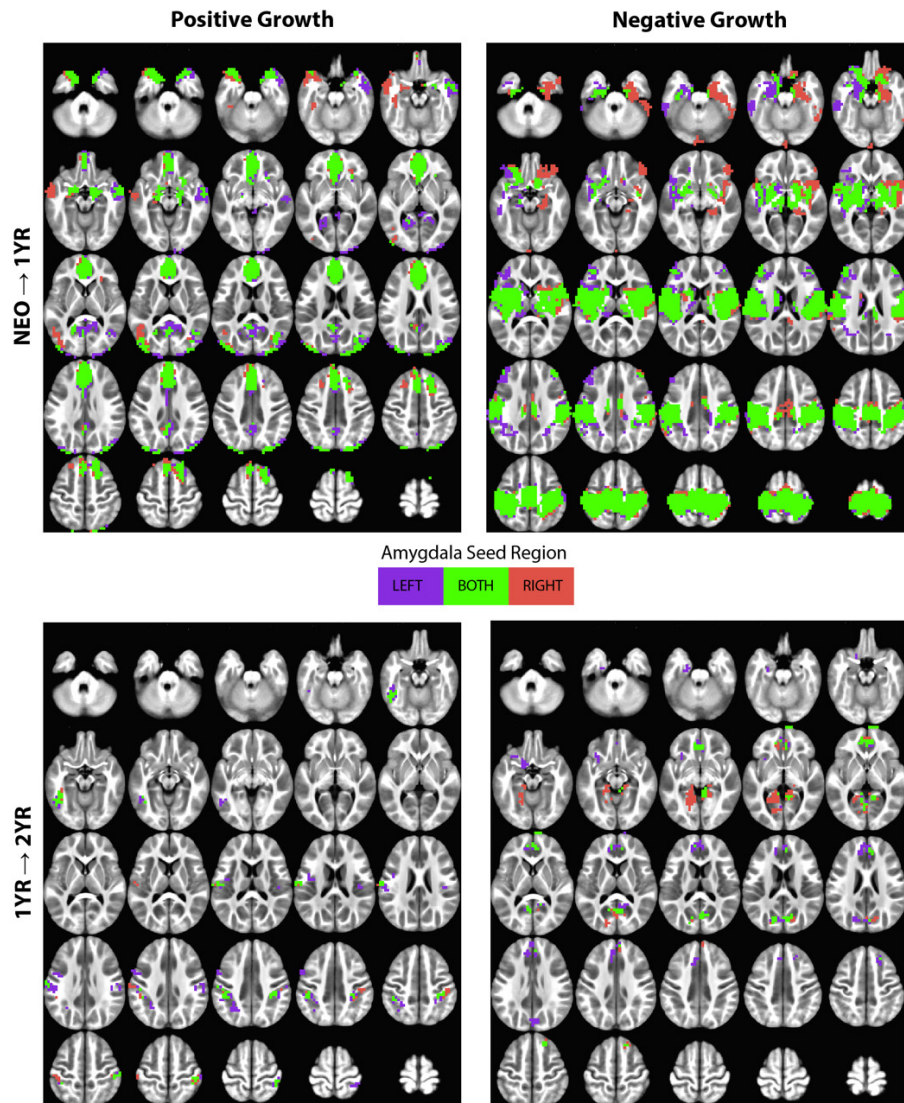

**Figure S2: Similarity in left and right amygdala functional connectivity growth in the first (NEO→1YR) and second (1YR→2YR) years.** Positive or negative significant growth [i.e.  $\pm \beta \cdot \log(\text{age})$ ] clusters (see Figure 2 in main text) color-coded by seed-region; left = purple, right = reddish-pink, and both = green.

**Sex and amygdala functional connectivity (FC).** In the linear-mixed-effect (LME) growth models we further explored potential sex effects using the cluster-based approach. Sex-effects were modeled as main-effects (i.e. specifically looking at the covariate in the context of all other variables) or sex-by-growth interactions (i.e. does sex modulate growth rates, again controlling for other factors). Three sex-specific FC effects were detected (**Figure S3**); (red cluster) left amygdala FC with itself and neighboring para/hippocampal gyrus (PHG/HIP-L) showed greater FC in females (NEO & 1YR), (blue cluster) females (1YR & 2YR) demonstrated more negative FC between the left amygdala and right supramarginal gyrus (SMG-R) / rolandic operculum (ROL-R), and (yellow cluster) females showed lower growth rates than males between the left amygdala and left inferior frontal gyrus triangular (IFGtriang-L) / middle frontal gyrus (MFG-L) during the first year (NEO→1YR).



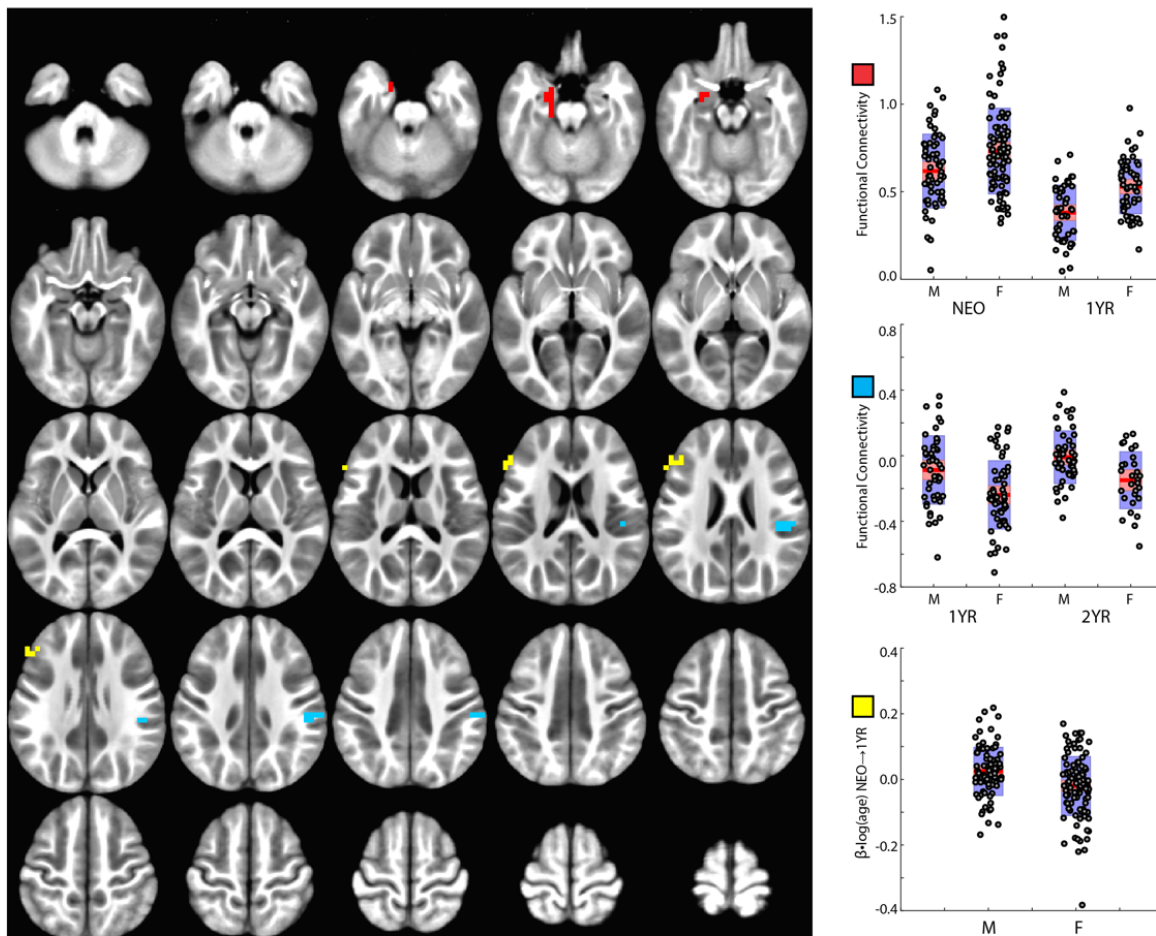

**Figure S3: Sex-specific effects involving left amygdala functional connectivity (FC).** Significant clusters ( $\alpha = 0.05$ , see methods) showing sex effects [ $\beta \cdot \text{Sex}$  or  $\beta \cdot \text{Sex} : \log(\text{age})$ ] illustrated on the left with corresponding group distributions based on voxel-wise averages shown on the right. Red cluster (13 voxels); peak-voxel-statistics (PVS):  $t = 3.89$ ,  $\beta = 0.14$ ,  $XYZ = [19, -1, -21]$ . Cyan cluster (19 voxels); PVS:  $t = -4.78$ ,  $\beta = -0.19$ ,  $XYZ = [-49, 23, 31]$ . Yellow cluster (15 voxels); PVS:  $t = -4.62$ ,  $\beta = -0.24$ ,  $XYZ = [51, -21, 19]$ . Distribution plots show individual subjects (grey markers), means (red line), standard errors of the means (SEM; shaded red), and standard deviations (SD; shaded blue).

**Table S2: AAL-regions used in cluster descriptions.**

| Region                    |              | Hemisphere | Abbreviation |
|---------------------------|--------------|------------|--------------|
| Precentral gyrus          |              | left       | PreCG-L      |
| Precentral gyrus          |              | right      | PreCG-R      |
| Superior frontal gyrus    | (dorsal)     | left       | SFGdor-L     |
| Superior frontal gyrus    | (dorsal)     | right      | SFGdor-R     |
| Orbitofrontal cortex      | (superior)   | left       | ORBsup-L     |
| Orbitofrontal cortex      | (superior)   | right      | ORBsup-R     |
| Middle frontal gyrus      |              | left       | MFG-L        |
| Middle frontal gyrus      |              | right      | MFG-R        |
| Orbitofrontal cortex      | (middle)     | left       | ORBmid-L     |
| Orbitofrontal cortex      | (middle)     | right      | ORBmid-R     |
| Inferior frontal gyrus    | (opercular)  | left       | IFGoperc-L   |
| Inferior frontal gyrus    | (opercular)  | right      | IFGoperc-R   |
| Inferior frontal gyrus    | (triangular) | left       | IFGtriang-L  |
| Inferior frontal gyrus    | (triangular) | right      | IFGtriang-R  |
| Orbitofrontal cortex      | (inferior)   | left       | ORBinf-L     |
| Orbitofrontal cortex      | (inferior)   | right      | ORBinf-R     |
| Rolandic operculum        |              | left       | ROL-L        |
| Rolandic operculum        |              | right      | ROL-R        |
| Supplementary motor area  |              | left       | SMA-L        |
| Supplementary motor area  |              | right      | SMA-R        |
| Olfactory                 |              | left       | OLF-L        |
| Olfactory                 |              | right      | OLF-R        |
| Superior frontal gyrus    | (medial)     | left       | SFGmed-L     |
| Superior frontal gyrus    | (medial)     | right      | SFGmed-R     |
| Orbitofrontal cortex      | (medial)     | left       | ORBmed-L     |
| Orbitofrontal cortex      | (medial)     | right      | ORBmed-R     |
| Rectus gyri               |              | left       | REC-L        |
| Rectus gyri               |              | right      | REC-R        |
| Insula                    |              | left       | INS-L        |
| Insula                    |              | right      | INS-R        |
| Anterior cingulate gyrus  |              | left       | ACG-L        |
| Anterior cingulate gyrus  |              | right      | ACG-R        |
| Middle cingulate gyrus    |              | left       | MCG-L        |
| Middle cingulate gyrus    |              | right      | MCG-R        |
| Posterior cingulate gyrus |              | left       | PCG-L        |
| Posterior cingulate gyrus |              | right      | PCG-R        |
| Hippocampus               |              | left       | HIP-L        |
| Hippocampus               |              | right      | HIP-R        |
| Parahippocampal gyrus     |              | left       | PHG-L        |
| Parahippocampal gyrus     |              | right      | PHG-R        |
| Amygdala                  |              | left       | AMYG-L       |
| Amygdala                  |              | right      | AMYG-R       |
| Calcarine cortex          |              | left       | CAL-L        |
| Calcarine cortex          |              | right      | CAL-R        |
| Cuneus                    |              | left       | CUN-L        |
| Cuneus                    |              | right      | CUN-R        |
| Lingual gyrus             |              | left       | LING-L       |
| Lingual gyrus             |              | right      | LING-R       |
| Superior occipital gyrus  |              | left       | SOG-L        |
| Superior occipital gyrus  |              | right      | SOG-R        |
| Middle occipital gyrus    |              | left       | MOG-L        |
| Middle occipital gyrus    |              | right      | MOG-R        |
| Inferior occipital gyrus  |              | left       | IOG-L        |
| Inferior occipital gyrus  |              | right      | IOG-R        |
| Fusiform gyrus            |              | left       | FFG-L        |
| Fusiform gyrus            |              | right      | FFG-R        |
| Postcentral gyrus         |              | left       | PoCG-L       |
| Postcentral gyrus         |              | right      | PoCG-R       |
| Superior parietal gyrus   |              | left       | SPG-L        |
| Superior parietal gyrus   |              | right      | SPG-R        |
| Inferior parietal lobule  |              | left       | IPL-L        |
| Inferior parietal lobule  |              | right      | IPL-R        |
| Supramarginal gyrus       |              | left       | SMG-L        |
| Supramarginal gyrus       |              | right      | SMG-R        |
| Angular gyrus             |              | left       | ANG-L        |
| Angular gyrus             |              | right      | ANG-R        |
| Precuneus                 |              | left       | PCUN-L       |
| Precuneus                 |              | right      | PCUN-R       |
| Paracentral lobule        |              | left       | PCL-L        |
| Paracentral lobule        |              | right      | PCL-R        |
| Caudate                   |              | left       | CAU-L        |
| Caudate                   |              | right      | CAU-R        |
| Putamen                   |              | left       | PUT-L        |
| Putamen                   |              | right      | PUT-R        |
| Pallidum                  |              | left       | PAL-L        |
| Pallidum                  |              | right      | PAL-R        |
| Thalamus                  |              | left       | THA-L        |
| Thalamus                  |              | right      | THA-R        |
| Heschl gyrus              |              | left       | HES-L        |
| Heschl gyrus              |              | right      | HES-R        |
| Superior temporal gyrus   |              | left       | STG-L        |
| Superior temporal gyrus   |              | right      | STG-R        |
| Temporal pole             | (superior)   | left       | TPOsup-L     |
| Temporal pole             | (superior)   | right      | TPOsup-R     |
| Middle temporal gyrus     |              | left       | MTG-L        |
| Middle temporal gyrus     |              | right      | MTG-R        |
| Temporal pole             | (middle)     | left       | TPOmid-L     |
| Temporal pole             | (middle)     | right      | TPOmid-R     |
| Inferior temporal gyrus   |              | left       | ITG-L        |
| Inferior temporal gyrus   |              | right      | ITG-R        |

**Table S3: Cross-sectional positive clusters.**

| Group | Seed  | Cluster | t     | Z    | XYZ        | Area        | Size | Coverage                                                                                                                                                                                                                                                                                                                                                                                                                                                                                                                                                |
|-------|-------|---------|-------|------|------------|-------------|------|---------------------------------------------------------------------------------------------------------------------------------------------------------------------------------------------------------------------------------------------------------------------------------------------------------------------------------------------------------------------------------------------------------------------------------------------------------------------------------------------------------------------------------------------------------|
| NEO   | LEFT  | 1       | 42.81 | 1.02 | 23,-1,-21  | AMYG-L      | 4180 | INS-L, THA-L, PUT-L, HIP-L, PHG-L, PoCG-L, PHG-R, THA-R, PUT-R, TPOsup-L, INS-R, PoCG-R, STG-L, ORBinf-L, FFG-L, CAU-L, ITG-L, MTG-L, AMYG-L, HIP-R, CAU-R, OLF-R, OLF-L, ROL-L, ROL-R, FFG-R, PAL-L, TPOsup-R, ORBinf-R, TPOmid-L, PreCG-R, AMYG-R, PAL-R, PCL-L, STG-R, IFGoperc-L, IFGtriangl-L, SMA-L, REC-R, LING-R, PreCG-L, TPOmid-R, SMA-R, ITG-R, REC-L, LING-L, HES-L, ORBsup-L, ACG-L, IFGoperc-R, ORBsup-R, HES-R, SMG-R, PCL-R, MCG-L, PCUN-L, MCG-R, ACG-R, PCUN-R, IPL-L, ORBmed-R, PCG-L, SMG-L, IFGtriang-R, PCG-R, SFGdor-R, ORBmed-L |
| 1YR   | LEFT  | 1       | 40.42 | 1.18 | 19,-1,-13  | AMYG-L      | 3292 | ACG-L, ACG-R, SFGmed-L, PHG-R, HIP-L, TPOsup-L, PHG-L, INS-L, HIP-R, THA-L, MTG-L, TPOsup-R, FFG-L, TPOmid-R, AMYG-L, FFG-R, SFGmed-L, TPOmid-L, MTG-R, OLF-L, OLF-R, AMYG-R, THA-R, PUT-L, ORBmed-R, SFGdor-R, CAU-L, PUT-R, ORBinf-L, INS-R, ITG-L, ORBmed-L, CAU-R, ORBinf-R, PCUN-R, REC-L, PCUN-L, LING-R, STG-L, MCG-R, LING-L, ITG-R, PAL-L, MCG-L, REC-R, STG-R, CAL-L, MFG-R, PCG-R, PAL-R, PCG-L, SFGdor-L, CAL-R, SMA-R, ORBsup-L, ORBsup-R, MGF-L, SMA-L, CUN-R, CUN-L, IFGtriangl-L                                                        |
| 1YR   | LEFT  | 2       | 5.04  | 0.12 | 35,79,19   | MOG-L       | 11   | MOG-L                                                                                                                                                                                                                                                                                                                                                                                                                                                                                                                                                   |
| 2YR   | LEFT  | 1       | 25.37 | 0.88 | 19,3,-9    | AMYG-L      | 1963 | ACG-L, HIP-L, ACG-R, TPOsup-L, INS-L, PHG-R, FFG-L, HIP-R, THA-L, TPOsup-R, AMYG-L, PHG-L, TPOmid-L, TPOmid-R, OLF-R, OLF-L, FFG-R, AMYG-R, CAU-L, MTG-L, INS-R, ITG-L, PUT-L, MTG-R, THA-R, SFGmed-L, CAU-R, STG-L, PUT-R, STG-R, ORBmed-R, ITG-R, ORBinf-L, REC-L, ORBinf-R, ORBmed-L, SFGmed-L, LING-R, PAL-L, REC-R, LING-L, ORBsup-R, ROL-L, ORBsup-L, PAL-R, MCG-L, IOG-L, PCG-R, MCG-R                                                                                                                                                           |
| 2YR   | LEFT  | 2       | 4.18  | 0.10 | -17,79,-17 | LING-R      | 16   | IOG-R, LING-R, MOG-R                                                                                                                                                                                                                                                                                                                                                                                                                                                                                                                                    |
| 2YR   | LEFT  | 3       | 4.11  | 0.14 | -53,3,31   | PoCG-R      | 8    | PoCG-R, PreCG-R                                                                                                                                                                                                                                                                                                                                                                                                                                                                                                                                         |
| NEO   | RIGHT | 1       | 43.61 | 0.60 | -21,3,-13  | AMYG-R      | 4598 | PHG-R, INS-L, INS-R, ITG-R, FFG-R, HIP-R, PUT-R, THA-R, STG-R, TPOsup-R, PUT-L, MTG-R, THA-L, HIP-L, PHG-L, PoCG-L, ORBinf-R, TPOmid-R, PoCG-R, STG-L, TPOsup-L, ORBinf-L, ROL-R, FFG-L, OLF-R, AMYG-R, CAU-R, ITG-L, MTG-L, CAU-L, ROL-L, OLF-L, AMYG-L, PreCG-R, PAL-L, LING-R, PAL-R, TPOmid-L, ACG-R, REC-R, IFGoperc-R, ORBsup-R, SMG-R, REC-L, HES-R, MCG-R, HES-L, LING-L, ORBsup-L, PreCG-L, IFGtriang-R, IFGoperc-L, PCUN-R, ORBmed-R, PCL-R, PCG-R, SMA-R, PCL-L, IFGtriangl-L, IPL-L, PCUN-L, SMG-L, PCG-L, ACG-L, CAL-R, ORBmed-L, ORBmid-R |
| 1YR   | RIGHT | 1       | 39.75 | 0.82 | -17,3,-9   | AMYG-R      | 3584 | MTG-R, PHG-R, ACG-R, ACG-L, TPOsup-L, TPOsup-R, HIP-R, FFG-R, TPOmid-R, MTG-L, HIP-L, SFGmed-L, SFGmed-L, AMYG-R, FFG-L, TPOmid-L, PHG-L, ITG-R, OLF-R, INS-L, THA-R, ORBmed-R, AMYG-L, STG-R, SFGdor-R, THA-L, OLF-L, ITG-L, INS-R, ORBinf-R, PUT-R, CAU-L, STG-L, ORBinf-L, CAU-R, ORBmed-L, REC-L, PCUN-R, PUT-L, REC-R, LING-R, MFG-R, MCG-R, LING-L, MOG-R, PCUN-L, ANG-R, PCG-R, SMA-R, ORBsup-R, CAL-L, PAL-L, PAL-R, SFGdor-L, ORBsup-L, CAL-R, PCG-L, MCG-L, IFGtriang-R, ORBmid-R, CUN-R                                                      |
| 1YR   | RIGHT | 2       | 5.04  | 0.12 | 43,43,11   | MTG-L       | 107  | MTG-L, MOG-L, STG-L, ANG-L                                                                                                                                                                                                                                                                                                                                                                                                                                                                                                                              |
| 1YR   | RIGHT | 3       | 4.74  | 0.12 | -13,83,-13 | CAL-R       | 28   | CAL-R, IOG-R, LING-R, MOG-R                                                                                                                                                                                                                                                                                                                                                                                                                                                                                                                             |
| 1YR   | RIGHT | 4       | 4.14  | 0.10 | 11,87,-13  | CAL-L       | 12   | CAL-L, MOG-L, IOG-L                                                                                                                                                                                                                                                                                                                                                                                                                                                                                                                                     |
| 1YR   | RIGHT | 5       | 4.72  | 0.10 | -37,-13,27 | IFGoperc-R  | 10   | IFGoperc-R, IFGtriang-R                                                                                                                                                                                                                                                                                                                                                                                                                                                                                                                                 |
| 2YR   | RIGHT | 1       | 30.20 | 0.97 | -17,3,-9   | AMYG-R      | 2086 | TPOsup-L, TPOsup-R, HIP-R, PHG-R, ACG-R, FFG-R, FFG-L, TPOmid-R, ACG-L, HIP-L, AMYG-R, INS-L, MTG-L, OLF-R, ITG-L, MTG-R, TPOmid-L, AMYG-L, STG-R, PHG-L, ITG-R, INS-R, OLF-L, THA-R, PUT-R, CAU-L, THA-L, STG-L, ORBmed-R, CAU-R, SFGmed-L, PUT-L, ORBinf-R, SFGmed-L, REC-L, REC-R, ORBmed-L, ORBinf-L, IOG-L, ORBsup-R, PAL-R, LING-R, ROL-L, MCG-R, PAL-L, ORBsup-L, PCG-R, ROL-R                                                                                                                                                                   |
| 2YR   | RIGHT | 2       | 5.95  | 0.16 | -21,75,-13 | IOG-R       | 89   | IOG-R, MOG-R, ITG-R, LING-R, CAL-R, FFG-R, MTG-R, SOG-R                                                                                                                                                                                                                                                                                                                                                                                                                                                                                                 |
| 2YR   | RIGHT | 3       | 5.68  | 0.18 | -53,39,11  | MTG-R       | 77   | MTG-R, STG-R                                                                                                                                                                                                                                                                                                                                                                                                                                                                                                                                            |
| 2YR   | RIGHT | 4       | 5.47  | 0.12 | 15,79,-17  | CAL-L       | 52   | MOG-L, IOG-L, CAL-L, LING-L, SOG-L, FFG-L                                                                                                                                                                                                                                                                                                                                                                                                                                                                                                               |
| 2YR   | RIGHT | 5       | 5.61  | 0.16 | -1,-33,43  | SFGmed-L    | 20   | SFGmed-L, SFGdor-R, SFGmed-L                                                                                                                                                                                                                                                                                                                                                                                                                                                                                                                            |
| 2YR   | RIGHT | 6       | 4.46  | 0.12 | 43,63,-5   | MOG-L       | 9    | MTG-L, MOG-L                                                                                                                                                                                                                                                                                                                                                                                                                                                                                                                                            |
| 2YR   | RIGHT | 7       | 4.53  | 0.11 | -33,-9,23  | IFGoperc-R  | 9    | IFGoperc-R, PreCG-R                                                                                                                                                                                                                                                                                                                                                                                                                                                                                                                                     |
| 2YR   | RIGHT | 8       | 6.20  | 0.18 | -17,-21,-1 | CAU-R       | 8    | CAU-R                                                                                                                                                                                                                                                                                                                                                                                                                                                                                                                                                   |
| 2YR   | RIGHT | 9       | 4.53  | 0.14 | -41,-25,23 | IFGtriang-R | 8    | IFGtriang-R, IFGoperc-R                                                                                                                                                                                                                                                                                                                                                                                                                                                                                                                                 |

**Group:** neonate (NEO), 1-year (1YR), and 2-year (2YR) old. **Seed:** left or right amygdala. **Cluster:** label within group and seed for positive cross-sectional clusters. **t:** t-statistic at cluster peak. **Z:** Fisher's Z-transformed correlation measure at cluster peak. **XYZ:** spatial coordinates of cluster peak. **Area:** AAL area associated with cluster peak (see Table S2). **Size:** cluster size in voxels. **Coverage:** AAL areas included in cluster extent.

**Table S4: Cross-sectional negative clusters.**

| Group | Seed  | Cluster | t      | Z     | XYZ        | Area       | Size | Coverage                                                                                                                                                                                                                                                                                                                                   |
|-------|-------|---------|--------|-------|------------|------------|------|--------------------------------------------------------------------------------------------------------------------------------------------------------------------------------------------------------------------------------------------------------------------------------------------------------------------------------------------|
| NEO   | LEFT  | 1       | -10.45 | -0.26 | 3,63,59    | PCUN-R     | 1711 | PCUN-L, PCUN-R, SPG-R, SPG-L, IPL-L, ANG-R, MOG-R, SOG-R, SOG-L, IPL-R, MOG-L, CUN-R, CUN-L, ANG-L, MCG-R, CAL-R, MCG-L, SMG-L, PCG-L, MTG-R, CAL-L                                                                                                                                                                                        |
| NEO   | LEFT  | 2       | -4.42  | -0.11 | -1,-57,-5  | ORBmed-R   | 26   | ORBmed-R, REC-R, ORBmed-L, ORBsup-R, REC-L                                                                                                                                                                                                                                                                                                 |
| NEO   | LEFT  | 3       | -5.57  | -0.05 | 15,-21,-33 | TPOmid-L   | 22   | TPOmid-L, TPOsup-L, FFG-L, PHG-L                                                                                                                                                                                                                                                                                                           |
| 1YR   | LEFT  | 1       | -11.94 | -0.26 | 23,47,43   | SPG-L      | 2807 | IPL-L, SPG-R, PoCG-L, PoCG-R, SPG-L, IPL-R, SMG-R, PCUN-L, PCUN-R, ANG-L, PreCG-L, SMG-L, ANG-R, PreCG-R, SMA-R, MCG-R, PCL-L, MOG-L, ROL-R, SMA-L, CUN-L, PCL-R, CAL-L, ROL-L, STG-L, SOG-R, STG-R, SOG-L, SFGdor-L, SFGdor-R, LING-R, CUN-R, HES-R, LING-L, INS-L, MOG-R, IFGoperc-L, INS-R, PCG-R, MGF-L, HES-L, CAL-R                  |
| 1YR   | LEFT  | 2       | -8.36  | -0.18 | 39,-41,19  | MGF-L      | 238  | MGF-L, IFGtriangl-L, ORBmid-L, SFGdor-L, ORBinf-L, ORBsup-L                                                                                                                                                                                                                                                                                |
| 1YR   | LEFT  | 3       | -7.41  | -0.16 | -29,-41,31 | MFG-R      | 120  | MFG-R, IFGtriang-R, SFGdor-R                                                                                                                                                                                                                                                                                                               |
| 1YR   | LEFT  | 4       | -5.72  | -0.09 | 55,35,-25  | ITG-L      | 84   | ITG-L, MTG-L, IOG-L, MOG-L                                                                                                                                                                                                                                                                                                                 |
| 1YR   | LEFT  | 5       | -5.80  | -0.15 | -45,51,-21 | ITG-R      | 74   | ITG-R, MTG-R, IOG-R, FFG-R                                                                                                                                                                                                                                                                                                                 |
| 1YR   | LEFT  | 6       | -6.37  | -0.15 | -49,-13,11 | IFGoperc-R | 62   | ROL-R, IFGoperc-R, PreCG-R, IFGtriang-R, TPOsup-R                                                                                                                                                                                                                                                                                          |
| 1YR   | LEFT  | 7       | -5.02  | -0.12 | -17,67,7   | CAL-R      | 16   | CAL-R, SOG-R, CUN-R, LING-R                                                                                                                                                                                                                                                                                                                |
| 1YR   | LEFT  | 8       | -5.27  | -0.14 | 11,27,27   | MCG-L      | 16   | MCG-L                                                                                                                                                                                                                                                                                                                                      |
| 1YR   | LEFT  | 9       | -5.33  | -0.15 | -17,79,23  | SOG-R      | 14   | SOG-R, MOG-R, CUN-R                                                                                                                                                                                                                                                                                                                        |
| 1YR   | LEFT  | 10      | -5.31  | -0.13 | 27,67,-1   | MOG-L      | 11   | MOG-L, SOG-L                                                                                                                                                                                                                                                                                                                               |
| 1YR   | LEFT  | 11      | -4.51  | -0.09 | 35,-53,-5  | ORBmid-L   | 10   | ORBmid-L, ORBinf-L                                                                                                                                                                                                                                                                                                                         |
| 2YR   | LEFT  | 1       | -8.01  | -0.21 | 23,55,47   | SPG-L      | 1569 | PCUN-L, SPG-L, PoCG-L, PCUN-R, IPL-L, SPG-R, PoCG-R, PCL-L, ANG-L, SOG-L, CUN-L, CUN-R, PreCG-R, PreCG-L, PCL-R, SMG-L, SMA-R, MCG-R, SMA-L, SOG-R, IPL-R, MOG-L, ROL-L, SFGdor-L, INS-L, SFGdor-R, MCG-L, ANG-R, CAL-L                                                                                                                    |
| 2YR   | LEFT  | 2       | -6.14  | -0.18 | -41,55,35  | ANG-R      | 57   | IPL-R, ANG-R, SMG-R                                                                                                                                                                                                                                                                                                                        |
| 2YR   | LEFT  | 3       | -5.05  | -0.13 | -17,-57,23 | SFGdor-R   | 46   | MFG-R, SFGdor-R                                                                                                                                                                                                                                                                                                                            |
| 2YR   | LEFT  | 4       | -5.64  | -0.13 | 23,-53,19  | MGF-L      | 41   | MGF-L, SFGdor-L                                                                                                                                                                                                                                                                                                                            |
| 2YR   | LEFT  | 5       | -5.25  | -0.15 | 15,-61,-1  | ORBsup-L   | 10   | ORBsup-L, SFGdor-L, ORBmed-L                                                                                                                                                                                                                                                                                                               |
| 2YR   | LEFT  | 6       | -4.93  | -0.12 | -9,-65,7   | SFGmed-L   | 10   | ORBsup-R, SFGmed-L, SFGdor-R, ORBmed-R                                                                                                                                                                                                                                                                                                     |
| 2YR   | LEFT  | 7       | -4.86  | -0.15 | -1,79,-21  | CAL-L      | 7    | CAL-L, LING-R                                                                                                                                                                                                                                                                                                                              |
| 2YR   | LEFT  | 8       | -4.44  | -0.11 | -41,31,27  | SMG-R      | 7    | SMG-R                                                                                                                                                                                                                                                                                                                                      |
| 2YR   | LEFT  | 9       | -3.97  | -0.11 | 35,-29,35  | MGF-L      | 7    | MGF-L                                                                                                                                                                                                                                                                                                                                      |
| 2YR   | LEFT  | 10      | -4.61  | -0.14 | 3,11,59    | SMA-L      | 7    | SMA-L, SMA-R                                                                                                                                                                                                                                                                                                                               |
| NEO   | RIGHT | 1       | -9.66  | -0.23 | 7,79,39    | PCUN-L     | 1107 | PCUN-L, SPG-L, SPG-R, PCUN-R, IPL-L, SOG-L, ANG-R, SOG-R, MOG-R, CUN-L, MOG-L, CUN-R, ANG-L, MCG-L, IPL-R, PCG-L, MCG-R                                                                                                                                                                                                                    |
| NEO   | RIGHT | 2       | -6.61  | -0.14 | 3,-21,43   | SFGmed-L   | 86   | SFGmed-L, SMA-L, SFGmed-L, ACG-L                                                                                                                                                                                                                                                                                                           |
| NEO   | RIGHT | 3       | -4.90  | -0.11 | 23,-9,43   | MGF-L      | 46   | MGF-L, SFGdor-L                                                                                                                                                                                                                                                                                                                            |
| NEO   | RIGHT | 4       | -7.81  | -0.07 | 15,-21,-33 | TPOmid-L   | 30   | TPOmid-L, TPOsup-L, FFG-L, PHG-L                                                                                                                                                                                                                                                                                                           |
| 1YR   | RIGHT | 1       | -10.72 | -0.24 | 27,47,47   | IPL-L      | 3051 | IPL-L, PoCG-L, SPG-L, PoCG-R, PCUN-L, SPG-R, PreCG-L, IPL-R, PCUN-R, SMG-R, PCL-L, SMA-L, PreCG-R, SMA-R, ANG-L, SMG-L, MCG-L, MCG-R, PCL-R, ANG-R, ROL-L, CUN-L, CAL-L, STG-L, SFGdor-L, ROL-R, MOG-L, SOG-L, LING-R, CUN-R, STG-R, SFGdor-R, IFGoperc-L, HES-R, SOG-R, LING-L, INS-L, INS-R, PCG-L, MGF-L, PCG-R, IFGtriangl-L, TPOsup-L |
| 1YR   | RIGHT | 2       | -7.96  | -0.13 | 39,-45,23  | MGF-L      | 231  | MGF-L, IFGtriangl-L, SFGdor-L, ORBmid-L, ORBsup-L                                                                                                                                                                                                                                                                                          |
| 1YR   | RIGHT | 3       | -6.26  | -0.08 | -29,-41,35 | MFG-R      | 73   | MFG-R                                                                                                                                                                                                                                                                                                                                      |
| 1YR   | RIGHT | 4       | -6.48  | -0.18 | -49,-13,7  | IFGoperc-R | 44   | IFGoperc-R, ROL-R, PreCG-R, TPOsup-R                                                                                                                                                                                                                                                                                                       |
| 1YR   | RIGHT | 5       | -5.61  | -0.12 | 27,-41,-13 | ORBinf-L   | 16   | ORBinf-L, ORBmid-L, ORBsup-L                                                                                                                                                                                                                                                                                                               |
| 1YR   | RIGHT | 6       | -4.48  | -0.10 | 55,23,-25  | ITG-L      | 10   | ITG-L, MTG-L                                                                                                                                                                                                                                                                                                                               |
| 2YR   | RIGHT | 1       | -9.83  | -0.24 | 3,35,59    | PCL-L      | 1785 | PCUN-L, PoCG-L, SPG-L, PCUN-R, PoCG-R, PCL-L, CUN-L, IPL-L, SPG-R, SMA-L, CUN-R, SMA-R, PreCG-R, PreCG-L, MCG-L, PCL-R, SOG-L, ANG-L, MCG-R, SMG-L, SOG-R, SFGdor-L, IPL-R, SFGdor-R, CAL-L, STG-L                                                                                                                                         |
| 2YR   | RIGHT | 2       | -6.43  | -0.15 | 23,-61,15  | SFGdor-L   | 98   | MGF-L, SFGdor-L, ORBsup-L, ORBmid-L                                                                                                                                                                                                                                                                                                        |
| 2YR   | RIGHT | 3       | -5.11  | -0.15 | -37,55,35  | ANG-R      | 14   | IPL-R, ANG-R, SMG-R                                                                                                                                                                                                                                                                                                                        |
| 2YR   | RIGHT | 4       | -4.85  | -0.16 | 31,27,19   | INS-L      | 13   | ROL-L, INS-L, PoCG-L                                                                                                                                                                                                                                                                                                                       |
| 2YR   | RIGHT | 5       | -4.86  | -0.14 | 7,47,-5    | CAL-L      | 12   | LING-L, CAL-L                                                                                                                                                                                                                                                                                                                              |
| 2YR   | RIGHT | 6       | -5.45  | -0.15 | -9,-65,3   | ORBsup-R   | 11   | ORBsup-R, SFGmed-L, SFGdor-R, ORBmed-R                                                                                                                                                                                                                                                                                                     |
| 2YR   | RIGHT | 7       | -5.49  | -0.17 | -1,83,-13  | CAL-L      | 8    | CAL-L, LING-R                                                                                                                                                                                                                                                                                                                              |
| 2YR   | RIGHT | 8       | -5.08  | -0.15 | -29,-57,11 | MFG-R      | 8    | MFG-R                                                                                                                                                                                                                                                                                                                                      |
| 2YR   | RIGHT | 9       | -5.17  | -0.17 | -29,23,19  | ROL-R      | 8    | ROL-R, INS-R, HES-R                                                                                                                                                                                                                                                                                                                        |

**Group:** neonate (NEO), 1-year (1YR), and 2-year (2YR) old. **Seed:** left or right amygdala. **Cluster:** label within group and seed for negative cross-sectional clusters. **t:** t-statistic at cluster peak. **Z:** Fisher's Z-transformed correlation measure at cluster peak. **XYZ:** spatial coordinates of cluster peak. **Area:** AAL area associated with cluster peak (see Table S2). **Size:** cluster size in voxels. **Coverage:** AAL areas included in cluster extent.

**Table S5: Longitudinal positive clusters.**

| Group   | Seed  | Cluster | t     | $\beta$ | XYZ         | Area     | Size | Coverage                                                                                                                                                 |
|---------|-------|---------|-------|---------|-------------|----------|------|----------------------------------------------------------------------------------------------------------------------------------------------------------|
| NEO→1YR | LEFT  | 1       | 12.04 | 0.29    | 7,-25,-1    | ACG-L    | 772  | ACG-L, ACG-R, SFGmed-L, ORBmed-R, SFGmed-L, SFGdor-R, ORBmed-L, MFG-R, MCG-R, REC-L, MCG-L, SMA-L, OLF-L, OLF-R, REC-R, CAU-L, SMA-R                     |
| NEO→1YR | LEFT  | 2       | 7.47  | 0.18    | -25,79,39   | SPG-R    | 223  | MOG-R, ANG-R, SOG-R, MTG-R, SPG-R, CUN-R, CAL-R                                                                                                          |
| NEO→1YR | LEFT  | 3       | 5.70  | 0.15    | 19,51,7     | CAL-L    | 187  | PCUN-R, PCUN-L, CAL-L, PCG-L, MCG-R, CUN-L, CAL-R, PCG-R, CUN-R, MCG-L, SOG-L                                                                            |
| NEO→1YR | LEFT  | 4       | 10.41 | 0.18    | -13,-13,-33 | TPOmid-R | 177  | MTG-R, TPOmid-R, TPOsup-R, STG-R, PHG-R, FFG-R, ITG-R                                                                                                    |
| NEO→1YR | LEFT  | 5       | 7.85  | 0.16    | 35,79,31    | MOG-L    | 109  | MOG-L, SOG-L, SPG-L, IPL-L, ANG-L, CUN-L, PCUN-L, MTG-L                                                                                                  |
| NEO→1YR | LEFT  | 6       | 9.42  | 0.33    | 19,-17,-33  | TPOmid-L | 75   | TPOmid-L, TPOsup-L, FFG-L, PHG-L                                                                                                                         |
| NEO→1YR | LEFT  | 7       | 22.25 | 0.39    | -17,3,-9    | AMYG-R   | 36   | AMYG-R, HIP-R, PHG-R, OLF-R                                                                                                                              |
| NEO→1YR | LEFT  | 8       | 24.70 | 0.60    | 23,-1,-13   | AMYG-L   | 25   | AMYG-L, OLF-L, HIP-L, PAL-L, PHG-L, CAU-L                                                                                                                |
| NEO→1YR | LEFT  | 9       | 16.63 | 0.36    | -21,-9,-9   | OLF-R    | 16   | INS-R, ORBinf-R, OLF-R, ORBsup-R                                                                                                                         |
| NEO→1YR | LEFT  | 10      | 7.02  | 0.13    | -1,31,-5    | LING-R   | 12   | PCG-R, LING-R, PCUN-R                                                                                                                                    |
| NEO→1YR | RIGHT | 1       | 11.94 | 0.24    | 7,-25,-1    | ACG-L    | 779  | SFGmed-L, ACG-L, ACG-R, SFGmed-L, SFGdor-R, ORBmed-R, ORBmed-L, MFG-R, REC-L, MCG-R, SMA-L, OLF-L, CAU-L, MCG-L, OLF-R, REC-R, SMA-R, SFGdor-L, ORBsup-L |
| NEO→1YR | RIGHT | 2       | 11.53 | 0.36    | 19,-17,-33  | TPOmid-L | 153  | TPOmid-L, TPOsup-L, MTG-L, FFG-L, PHG-L                                                                                                                  |
| NEO→1YR | RIGHT | 3       | 6.65  | 0.18    | 19,83,35    | SOG-L    | 123  | MOG-L, MTG-L, SOG-L, SPG-L, IPL-L, ANG-L, PCUN-L                                                                                                         |
| NEO→1YR | RIGHT | 4       | 7.07  | 0.18    | -25,79,39   | SPG-R    | 120  | MOG-R, ANG-R, SPG-R, SOG-R, MTG-R, CUN-R                                                                                                                 |
| NEO→1YR | RIGHT | 5       | 5.09  | 0.14    | 3,47,19     | PCG-L    | 50   | PCUN-L, PCG-L, PCUN-R, MCG-R, MCG-L, CAL-L, CUN-L                                                                                                        |
| NEO→1YR | RIGHT | 6       | 11.77 | 0.22    | -13,-13,-33 | TPOmid-R | 45   | TPOmid-L, TPOsup-R, PHG-R, FFG-R                                                                                                                         |
| NEO→1YR | RIGHT | 7       | 25.88 | 0.52    | 23,-1,-13   | AMYG-L   | 36   | AMYG-L, HIP-L, OLF-L, PHG-L, CAU-L, PAL-L, TPOsup-L                                                                                                      |
| NEO→1YR | RIGHT | 8       | 33.61 | 0.64    | -17,3,-9    | AMYG-R   | 32   | AMYG-R, HIP-R, OLF-R, PHG-R                                                                                                                              |
| NEO→1YR | RIGHT | 9       | 5.97  | 0.18    | -53,-1,-13  | MTG-R    | 31   | MTG-R, STG-R, TPOmid-R                                                                                                                                   |
| NEO→1YR | RIGHT | 10      | 18.90 | 0.44    | -21,-9,-9   | OLF-R    | 17   | INS-R, ORBinf-R, OLF-R, ORBsup-R, IFGtriang-R                                                                                                            |
| NEO→1YR | RIGHT | 11      | 4.37  | 0.13    | 19,-17,39   | SFGdor-L | 16   | MGF-L, SFGdor-L                                                                                                                                          |
| NEO→1YR | RIGHT | 12      | 6.32  | 0.15    | 35,11,-17   | ITG-L    | 14   | FFG-L, ITG-L                                                                                                                                             |
| NEO→1YR | RIGHT | 13      | 4.26  | 0.11    | 19,51,7     | CAL-L    | 12   | CAL-L, CUN-L, PCUN-L, SOG-L                                                                                                                              |
| 1YR→2YR | LEFT  | 1       | 4.94  | 0.58    | 39,35,-13   | ITG-L    | 45   | ITG-L, MTG-L, FFG-L, IOG-L                                                                                                                               |
| 1YR→2YR | LEFT  | 2       | 5.52  | 0.69    | 47,27,27    | SMG-L    | 41   | PoCG-L, SMG-L, STG-L, ROL-L, IPL-L                                                                                                                       |
| 1YR→2YR | LEFT  | 3       | 5.32  | 0.65    | 35,35,35    | IPL-L    | 32   | IPL-L, PoCG-L                                                                                                                                            |
| 1YR→2YR | LEFT  | 4       | 4.62  | 0.59    | 51,-1,39    | PreCG-L  | 26   | PreCG-L, ROL-L, INS-L                                                                                                                                    |
| 1YR→2YR | LEFT  | 5       | 5.59  | 0.66    | -33,31,35   | SMG-R    | 25   | PoCG-R, SMG-R, IPL-R                                                                                                                                     |
| 1YR→2YR | LEFT  | 6       | 4.78  | 0.67    | -37,39,55   | IPL-L    | 25   | PoCG-R, IPL-R, SPG-R, SMG-R                                                                                                                              |
| 1YR→2YR | LEFT  | 7       | 4.73  | 0.54    | 23,55,35    | SPG-L    | 20   | IPL-L, SPG-L, MOG-L                                                                                                                                      |
| 1YR→2YR | LEFT  | 8       | 4.36  | 0.62    | -41,23,31   | SMG-R    | 10   | ROL-R, SMG-R, PoCG-R                                                                                                                                     |
| 1YR→2YR | LEFT  | 9       | 3.99  | 0.46    | -53,19,31   | SMG-R    | 9    | SMG-R, PoCG-R                                                                                                                                            |
| 1YR→2YR | RIGHT | 1       | 4.97  | 0.55    | -33,31,35   | SMG-R    | 46   | PoCG-R, IPL-R, SMG-R, SPG-R                                                                                                                              |
| 1YR→2YR | RIGHT | 2       | 4.24  | 0.57    | 43,35,39    | IPL-L    | 31   | IPL-L, PoCG-L, SMG-L                                                                                                                                     |
| 1YR→2YR | RIGHT | 3       | 5.22  | 0.71    | 51,15,15    | STG-L    | 28   | PoCG-L, STG-L, SMG-L, ROL-L                                                                                                                              |
| 1YR→2YR | RIGHT | 4       | 5.77  | 0.56    | 35,27,-13   | ITG-L    | 27   | ITG-L, FFG-L, IOG-L, MTG-L                                                                                                                               |

**Group:** first year (NEO→1YR) and second year (1YR→2YR). **Seed:** left or right amygdala. **Cluster:** label within group and seed for positive growth clusters. **t:** t-statistic at cluster peak.  **$\beta$ :** beta estimate (i.e. log(age) growth term) at cluster peak. **XYZ:** spatial coordinates of cluster peak. **Area:** AAL area associated with cluster peak (see Table S2). **Size:** cluster size in voxels. **Coverage:** AAL areas included in cluster extent.

**Table S6: Longitudinal negative clusters.**

| Group   | Seed  | Cluster | t      | $\beta$ | XYZ        | Area     | Size | Coverage                                                                                                                                                                                                                                                                                                                                                                                                                                                                                                     |
|---------|-------|---------|--------|---------|------------|----------|------|--------------------------------------------------------------------------------------------------------------------------------------------------------------------------------------------------------------------------------------------------------------------------------------------------------------------------------------------------------------------------------------------------------------------------------------------------------------------------------------------------------------|
| NEO→1YR | LEFT  | 1       | -18.81 | -0.36   | -17,-1,-5  | PAL-R    | 3259 | PoCG-L, PoCG-R, IPL-L, PreCG-R, INS-L, ROL-R, PUT-L, SMG-R, PreCG-L, STG-L, ROL-L, PCL-L, THA-L, SMA-R, THA-R, PUT-R, INS-R, PHG-L, SMG-L, SMA-L, ORBinf-L, SPG-R, IPL-R, CAU-L, PCL-R, PAL-L, MCG-R, SPG-L, HIP-L, IFGoperc-L, FFG-L, PAL-R, IFGoperc-R, STG-R, PCUN-L, TPOsup-L, PCUN-R, HES-R, HES-L, AMYG-L, ANG-L, ORBsup-L, CAU-R, SFGdor-R, MOG-L, SFGdor-L, OLF-R, MTG-L, OLF-L, IFGtriangl-L, ORBinf-R, ORBmid-L, REC-L, ORBsup-R, ANG-R, TPOsup-R, REC-R, ITG-L, MCG-L, MOG-R, IFGtriangl-R, SOG-R |
| NEO→1YR | LEFT  | 2       | -6.42  | -0.18   | 35,-37,19  | MGF-L    | 127  | MGF-L, IFGtriangl-L                                                                                                                                                                                                                                                                                                                                                                                                                                                                                          |
| NEO→1YR | LEFT  | 3       | -8.45  | -0.22   | 35,-9,-41  | TPOmid-L | 44   | ITG-L, FFG-L, TPOmid-L, TPOsup-L                                                                                                                                                                                                                                                                                                                                                                                                                                                                             |
| NEO→1YR | LEFT  | 4       | -5.89  | -0.16   | 51,23,-21  | ITG-L    | 44   | ITG-L, MTG-L                                                                                                                                                                                                                                                                                                                                                                                                                                                                                                 |
| NEO→1YR | LEFT  | 5       | -5.13  | -0.14   | -37,-33,27 | MFG-R    | 39   | MFG-R, IFGtriangl-R                                                                                                                                                                                                                                                                                                                                                                                                                                                                                          |
| NEO→1YR | LEFT  | 6       | -11.27 | -0.31   | -9,3,-21   | PHG-R    | 19   | PHG-R, FFG-R                                                                                                                                                                                                                                                                                                                                                                                                                                                                                                 |
| NEO→1YR | LEFT  | 7       | -6.59  | -0.17   | -21,-5,-45 | FFG-R    | 15   | ITG-R, FFG-R                                                                                                                                                                                                                                                                                                                                                                                                                                                                                                 |
| NEO→1YR | LEFT  | 8       | -5.98  | -0.17   | 11,11,31   | MCG-L    | 15   | MCG-L                                                                                                                                                                                                                                                                                                                                                                                                                                                                                                        |
| NEO→1YR | RIGHT | 1       | -16.16 | -0.34   | -17,-1,-5  | PAL-R    | 3025 | PoCG-L, PoCG-R, PreCG-R, ROL-R, SMG-R, PreCG-L, IPL-L, INS-R, PUT-R, PUT-L, INS-L, SMA-R, ROL-L, PCL-L, THA-R, SMA-L, STG-R, STG-L, IPL-R, MCG-R, SPG-R, SMG-L, PCL-R, THA-L, ORBinf-L, IFGoperc-R, PAL-R, PAL-L, HES-R, SPG-L, PCUN-L, CAU-L, HES-L, IFGoperc-L, PCUN-R, PHG-L, CAU-R, SFGdor-L, TPOsup-R, TPOsup-L, HIP-R, MCG-L, SFGdor-R, HIP-L, ORBsup-L, ORBmid-L, OLF-L, PCG-R, LING-R, ANG-L, PHG-R, ACG-R, REC-L, IFGtriangl-R, ORBinf-R, MGF-L, MTG-L                                              |
| NEO→1YR | RIGHT | 2       | -13.90 | -0.39   | -25,3,-25  | PHG-R    | 378  | PHG-R, ITG-R, FFG-R, ORBinf-R, HIP-R, ORBsup-R, OLF-R, TPOmid-R, AMYG-R, TPOsup-R, REC-R, ORBmid-R                                                                                                                                                                                                                                                                                                                                                                                                           |
| NEO→1YR | RIGHT | 3       | -7.72  | -0.19   | 15,3,-33   | PHG-L    | 34   | FFG-L, PHG-L, ITG-L                                                                                                                                                                                                                                                                                                                                                                                                                                                                                          |
| NEO→1YR | RIGHT | 4       | -5.38  | -0.15   | 39,-37,23  | MGF-L    | 33   | MGF-L, IFGtriangl-L                                                                                                                                                                                                                                                                                                                                                                                                                                                                                          |
| NEO→1YR | RIGHT | 5       | -4.73  | -0.14   | -37,-37,31 | MFG-R    | 23   | MFG-R                                                                                                                                                                                                                                                                                                                                                                                                                                                                                                        |
| NEO→1YR | RIGHT | 6       | -6.99  | -0.19   | 11,11,31   | MCG-L    | 19   | MCG-L                                                                                                                                                                                                                                                                                                                                                                                                                                                                                                        |
| NEO→1YR | RIGHT | 7       | -5.61  | -0.15   | -1,87,-17  | CAL-L    | 17   | CAL-L, LING-R                                                                                                                                                                                                                                                                                                                                                                                                                                                                                                |
| NEO→1YR | RIGHT | 8       | -6.97  | -0.19   | 31,-5,-45  | ITG-L    | 15   | ITG-L, TPOmid-L, FFG-L                                                                                                                                                                                                                                                                                                                                                                                                                                                                                       |
| 1YR→2YR | LEFT  | 1       | -5.70  | -0.72   | -5,-41,3   | ORBmed-R | 122  | SFGmed-L, ACG-L, ACG-R, ORBmed-R, SFGmed-L, ORBmed-L, MCG-L                                                                                                                                                                                                                                                                                                                                                                                                                                                  |
| 1YR→2YR | LEFT  | 2       | -4.54  | -0.53   | -9,59,15   | CUN-R    | 94   | PCUN-R, CUN-R, CUN-L, PCUN-L, LING-R, CAL-L, CAL-R, PCG-L                                                                                                                                                                                                                                                                                                                                                                                                                                                    |
| 1YR→2YR | LEFT  | 3       | -4.49  | -0.58   | -21,-21,43 | MFG-R    | 14   | MFG-R, SFGdor-R                                                                                                                                                                                                                                                                                                                                                                                                                                                                                              |
| 1YR→2YR | LEFT  | 4       | -4.79  | -0.63   | 27,-17,-9  | INS-L    | 12   | ORBinf-L, INS-L                                                                                                                                                                                                                                                                                                                                                                                                                                                                                              |
| 1YR→2YR | LEFT  | 5       | -4.72  | -0.42   | -13,-65,-1 | ORBsup-R | 11   | ORBsup-R, SFGmed-L, SFGdor-R, ORBmed-R                                                                                                                                                                                                                                                                                                                                                                                                                                                                       |
| 1YR→2YR | LEFT  | 6       | -4.61  | -0.56   | 15,-13,-17 | ORBinf-L | 10   | OLF-L, ORBinf-L                                                                                                                                                                                                                                                                                                                                                                                                                                                                                              |
| 1YR→2YR | LEFT  | 7       | -5.34  | -0.70   | 19,3,-29   | PHG-L    | 9    | PHG-L, HIP-L                                                                                                                                                                                                                                                                                                                                                                                                                                                                                                 |
| 1YR→2YR | RIGHT | 1       | -5.81  | -0.67   | 3,51,7     | PCUN-L   | 125  | LING-L, CAL-L, PCUN-L, CUN-R, PCUN-R, CAL-R, PHG-L, CUN-L, HIP-L, PCG-L, THA-L                                                                                                                                                                                                                                                                                                                                                                                                                               |
| 1YR→2YR | RIGHT | 2       | -5.22  | -0.68   | -5,-41,3   | ORBmed-R | 45   | ACG-L, ORBmed-R, ACG-R, ORBmed-L, SFGmed-L, SFGmed-L                                                                                                                                                                                                                                                                                                                                                                                                                                                         |
| 1YR→2YR | RIGHT | 3       | -4.78  | -0.65   | -9,35,-1   | PCUN-R   | 41   | LING-R, PCUN-R, CAL-R, PCG-R, HIP-R, THA-R                                                                                                                                                                                                                                                                                                                                                                                                                                                                   |
| 1YR→2YR | RIGHT | 4       | -4.54  | -0.55   | 11,63,15   | CUN-L    | 13   | CUN-L, PCUN-L                                                                                                                                                                                                                                                                                                                                                                                                                                                                                                |
| 1YR→2YR | RIGHT | 5       | -4.34  | -0.53   | -5,-37,23  | ACG-R    | 12   | ACG-R, SFGmed-L                                                                                                                                                                                                                                                                                                                                                                                                                                                                                              |
| 1YR→2YR | RIGHT | 6       | -4.13  | -0.59   | -17,-21,51 | SFGdor-R | 11   | SFGdor-R, MFG-R                                                                                                                                                                                                                                                                                                                                                                                                                                                                                              |
| 1YR→2YR | RIGHT | 7       | -5.36  | -0.45   | -9,-65,3   | ORBsup-R | 10   | ORBsup-R, SFGmed-L, SFGdor-R, ORBmed-R                                                                                                                                                                                                                                                                                                                                                                                                                                                                       |

**Group:** first year (NEO→1YR) and second year (1YR→2YR). **Seed:** left or right amygdala. **Cluster:** label within group and seed for negative growth clusters. **t:** t-statistic at cluster peak.  **$\beta$ :** beta estimate (i.e. log(age) growth term) at cluster peak. **XYZ:** spatial coordinates of cluster peak. **Area:** AAL area associated with cluster peak (see Table S2). **Size:** cluster size in voxels. **Coverage:** AAL areas included in cluster extent.

**Table S7: Regional-level 4YR-ANX effects co-varying for IQ.**

| Group   | Seed  | Cluster | t     | $\beta$ | XYZ       | Area   | Size | Coverage                                                                       | Behavior              |      |       |              |        |      |      |       |
|---------|-------|---------|-------|---------|-----------|--------|------|--------------------------------------------------------------------------------|-----------------------|------|-------|--------------|--------|------|------|-------|
|         |       |         |       |         |           |        |      |                                                                                | 4YR-ANX ~ FC + 4YR-IQ |      |       |              |        |      |      |       |
|         |       |         |       |         |           |        |      |                                                                                | FC                    |      |       |              | 4YR-IQ |      |      |       |
|         |       |         |       |         |           |        |      |                                                                                | e                     | se   | t     | p            | e      | se   | t    | p     |
| 1YR→2YR | LEFT  | 5       | 5.59  | 0.66    | -33,31,35 | SMG-R  | 25   | PoCG-R, SMG-R, IPL-R                                                           | -9.43                 | 3.95 | -2.39 | 0.019        | 0.06   | 0.08 | 0.68 | 0.501 |
| 1YR→2YR | LEFT  | 6       | 4.78  | 0.67    | -37,39,55 | IPL-R  | 25   | PoCG-R, IPL-R, SPG-R, SMG-R                                                    | -6.22                 | 2.58 | -2.41 | 0.018        | 0.05   | 0.08 | 0.60 | 0.553 |
| 1YR→2YR | LEFT  | 2       | -4.54 | -0.53   | -9,59,15  | CUN-R  | 94   | PCUN-R, CUN-R, CUN-L, PCUN-L, LING-R, CAL-L, CAL-R, PCG-L                      | 10.64                 | 4.11 | 2.59  | 0.011        | 0.07   | 0.08 | 0.85 | 0.397 |
| 1YR→2YR | RIGHT | 1       | -5.81 | -0.67   | 3,51,7    | PCUN-L | 125  | LING-L, CAL-L, PCUN-L, CUN-R, PCUN-R, CAL-R, PHG-L, CUN-L, HIP-L, PCG-L, THA-L | 19.49                 | 7.54 | 2.58  | 0.011        | 0.06   | 0.08 | 0.79 | 0.430 |
| 1YR→2YR | RIGHT | 3       | -4.78 | -0.65   | -9,35,-1  | PCUN-R | 41   | LING-R, PCUN-R, CAL-R, PCG-R, HIP-R, THA-R                                     | 25.80                 | 9.01 | 2.86  | <b>0.005</b> | 0.07   | 0.08 | 0.86 | 0.391 |

**Group:** first year (NEO→1YR), and second year (1YR→2YR). **Seed:** left or right amygdala. **t:** t-statistic at cluster peak.  **$\beta$ :** beta estimate (i.e. log(age) growth term) at cluster peak. **Cluster:** label within group, seed, and sign (from Tables 2-6). **XYZ:** spatial coordinates of cluster peak. **Area:** AAL area associated with cluster peak (see Table S2). **Size:** cluster size in voxels. **Coverage:** AAL areas included in cluster extent. **Behavior:** summary statistics (e: estimate, se: standard error, t: t-statistic, and p: p-value) for multiple linear regression involving parented reported anxiety (4YR-ANX), functional connectivity (FC), and cognitive outcome (4YR-IQ). Bold p-values indicate < 0.01

**Table S8: Summary of regional-level 4YR-ANX and 4YR-ISC effects.**

| Group   | Seed  | Cluster | t      | Z or $\beta$ | XYZ        | Area     | Size | Coverage                                                                                                                                                                                                                                                                                                                 | Behavior |       |       |              |         |       |       |       |
|---------|-------|---------|--------|--------------|------------|----------|------|--------------------------------------------------------------------------------------------------------------------------------------------------------------------------------------------------------------------------------------------------------------------------------------------------------------------------|----------|-------|-------|--------------|---------|-------|-------|-------|
|         |       |         |        |              |            |          |      |                                                                                                                                                                                                                                                                                                                          | 4YR-ANX  |       |       |              | 4YR-ISC |       |       |       |
|         |       |         |        |              |            |          |      |                                                                                                                                                                                                                                                                                                                          | e        | se    | t     | p            | e       | se    | t     | p     |
| 1YR     | LEFT  | 1       | -11.94 | -0.26        | 23,47,43   | SPG-L    | 2807 | IPL-L, SPG-R, PoCG-L, PoCG-R, SPG-L, IPL-R, SMG-R, PCUN-L, PCUN-R, ANG-L, PreCG-L, SMG-L, ANG-R, PreCG-R, SMA-R, MCG-R, PCL-L, MOG-L, ROL-R, SMA-L, CUN-L, PCL-R, CAL-L, ROL-L, STG-L, SOG-R, STG-R, SOG-L, SFGdor-L, SFGdor-R, LING-R, CUN-R, HES-R, LING-L, INS-L, MOG-R, IFGperc-L, INS-R, PCG-R, MGF-L, HES-L, CAL-R |          |       |       |              | 40.13   | 18.72 | 2.14  | 0.036 |
| 1YR     | LEFT  | 5       | -5.80  | -0.15        | -45,51,-21 | ITG-R    | 74   | ITG-R, MTG-R, IOG-R, FFG-R                                                                                                                                                                                                                                                                                               | 19.74    | 8.26  | 2.39  | 0.020        |         |       |       |       |
| 2YR     | LEFT  | 2       | -6.14  | -0.18        | -41,55,35  | ANG-R    | 57   | IPL-R, ANG-R, SMG-R                                                                                                                                                                                                                                                                                                      |          |       |       |              | 13.75   | 6.55  | 2.10  | 0.041 |
| 2YR     | LEFT  | 4       | -5.64  | -0.13        | 23,-53,19  | MGF-L    | 41   | MGF-L, SFGdor-L                                                                                                                                                                                                                                                                                                          |          |       |       |              | 20.87   | 8.00  | 2.61  | 0.012 |
| 2YR     | RIGHT | 5       | -4.86  | -0.14        | 7,47,-5    | CAL-L    | 12   | LING-L, CAL-L                                                                                                                                                                                                                                                                                                            | 16.82    | 8.13  | 2.07  | 0.044        | -15.72  | 6.95  | -2.26 | 0.028 |
| 2YR     | RIGHT | 8       | -5.08  | -0.15        | -29,-57,11 | MFG-R    | 8    | MFG-R                                                                                                                                                                                                                                                                                                                    |          |       |       |              | 18.23   | 6.89  | 2.65  | 0.011 |
| NEO→1YR | LEFT  | 1       | 12.04  | 0.29         | 7,-25,-1   | ACG-L    | 772  | ACG-L, ACG-R, SFGmed-L, ORBmed-R, SFGmed-L, SFGdor-R, ORBmed-L, MFG-R, MCG-R, REC-L, MCG-L, SMA-L, OLF-L, OLF-R, REC-R, CAU-L, SMA-R                                                                                                                                                                                     |          |       |       |              | -63.81  | 27.66 | -2.31 | 0.023 |
| NEO→1YR | LEFT  | 3       | 5.70   | 0.15         | 19,51,7    | CAL-L    | 187  | PCUN-R, PCUN-L, CAL-L, PCG-L, MCG-R, CUN-L, CAL-R, PCG-R, CUN-R, MCG-L, SOG-L                                                                                                                                                                                                                                            |          |       |       |              | -68.44  | 26.45 | -2.59 | 0.011 |
| NEO→1YR | LEFT  | 6       | 9.42   | 0.33         | 19,-17,-33 | TPOmid-L | 75   | TPOmid-L, TPOsup-L, FFG-L, PHG-L                                                                                                                                                                                                                                                                                         |          |       |       |              | -48.69  | 19.14 | -2.54 | 0.012 |
| 1YR→2YR | LEFT  | 3       | 5.32   | 0.65         | 35,35,35   | IPL-L    | 32   | IPL-L, PoCG-L                                                                                                                                                                                                                                                                                                            | -5.12    | 2.55  | -2.01 | 0.047        |         |       |       |       |
| 1YR→2YR | LEFT  | 5       | 5.59   | 0.66         | -33,31,35  | SMG-R    | 25   | PoCG-R, SMG-R, IPL-R                                                                                                                                                                                                                                                                                                     | -10.14   | 3.83  | -2.65 | <b>0.010</b> |         |       |       |       |
| 1YR→2YR | LEFT  | 6       | 4.78   | 0.67         | -37,39,55  | IPL-R    | 25   | PoCG-R, IPL-R, SPG-R, SMG-R                                                                                                                                                                                                                                                                                              | -6.70    | 2.48  | -2.70 | <b>0.008</b> |         |       |       |       |
| NEO→1YR | LEFT  | 4       | -5.89  | -0.16        | 51,23,-21  | ITG-L    | 44   | ITG-L, MTG-L                                                                                                                                                                                                                                                                                                             |          |       |       |              | 62.73   | 26.03 | 2.41  | 0.018 |
| NEO→1YR | RIGHT | 8       | -6.97  | -0.19        | 31,-5,-45  | ITG-L    | 15   | ITG-L, TPOmid-L, FFG-L                                                                                                                                                                                                                                                                                                   | 14.77    | 6.91  | 2.14  | 0.035        |         |       |       |       |
| 1YR→2YR | LEFT  | 2       | -4.54  | -0.53        | -9,59,15   | CUN-R    | 94   | PCUN-R, CUN-R, CUN-L, PCUN-L, LING-R, CAL-L, CAL-R, PCG-L                                                                                                                                                                                                                                                                | 11.20    | 4.04  | 2.77  | <b>0.007</b> |         |       |       |       |
| 1YR→2YR | LEFT  | 3       | -4.49  | -0.58        | -21,-21,43 | MFG-R    | 14   | MFG-R, SFGdor-R                                                                                                                                                                                                                                                                                                          |          |       |       |              | 4.88    | 2.28  | 2.14  | 0.035 |
| 1YR→2YR | LEFT  | 4       | -4.79  | -0.63        | 27,-17,-9  | INS-L    | 12   | ORBinf-L, INS-L                                                                                                                                                                                                                                                                                                          | -27.40   | 13.17 | -2.08 | 0.040        |         |       |       |       |
| 1YR→2YR | RIGHT | 1       | -5.81  | -0.67        | 3,51,7     | PCUN-L   | 125  | LING-L, CAL-L, PCUN-L, CUN-R, PCUN-R, CAL-R, PHG-L, CUN-L, HIP-L, PCG-L, THA-L                                                                                                                                                                                                                                           | 20.65    | 7.38  | 2.80  | <b>0.006</b> |         |       |       |       |
| 1YR→2YR | RIGHT | 3       | -4.78  | -0.65        | -9,35,-1   | PCUN-R   | 41   | LING-R, PCUN-R, CAL-R, PCG-R, HIP-R, THA-R                                                                                                                                                                                                                                                                               | 25.25    | 8.97  | 2.81  | <b>0.006</b> |         |       |       |       |

**Group:** neonate (NEO), 1-year (1YR), 2-year (2YR), first year (NEO→1YR), and second year (1YR→2YR). **Seed:** left or right amygdala. **Cluster:** label within group, seed, and sign (from Tables 2-5). **t:** t-statistic at cluster peak. **Z or  $\beta$ :** Fisher's Z-transformed correlation (NEO, 1YR, 2YR) or beta estimate (i.e. log(age) growth term for NEO-1YR, 1YR-2YR) at cluster peak. **XYZ:** spatial coordinates of cluster peak. **Area:** AAL area associated with cluster peak (see Table S2). **Size:** cluster size in voxels. **Coverage:** other AAL areas included in cluster extent. **Behavior:** summary statistics (e: estimate, se: standard error, t: t-statistic, and p: p-value,) corresponding to linear relationship between parent reported measures at 4-years [anxiety (4YR-ANX) and inhibitory self-control (4YR-ISC)] and cluster-level functional connectivity estimates. Bold p-values indicate < 0.01.

**Table S9: Summary of regional-level 4YR-IQ effects.**

| Group   | Seed | Cluster | t     | Z or $\beta$ | XYZ       | Area     | Size | Coverage                                   | 4YR-IQ |       |       |              |
|---------|------|---------|-------|--------------|-----------|----------|------|--------------------------------------------|--------|-------|-------|--------------|
|         |      |         |       |              |           |          |      |                                            | e      | se    | t     | p            |
| NEO     | LEFT | 2       | -4.42 | -0.11        | -1,-57,-5 | ORBmed-R | 26   | ORBmed-R, REC-R, ORBmed-L, ORBsup-R, REC-L | -14.42 | 6.29  | -2.29 | 0.025        |
| 1YR     | LEFT | 4       | -5.72 | -0.09        | 55,35,-25 | ITG-L    | 84   | ITG-L, MTG-L, IOG-L, MOG-L                 | -26.52 | 12.23 | -2.17 | 0.034        |
| 2YR     | LEFT | 2       | -6.14 | -0.18        | -41,55,35 | ANG-R    | 57   | IPL-R, ANG-R, SMG-R                        | -23.34 | 8.90  | -2.62 | 0.012        |
| 2YR     | LEFT | 7       | -4.86 | -0.15        | -1,79,-21 | CAL-L    | 7    | CAL-L, LING-R                              | 23.99  | 10.62 | 2.26  | 0.029        |
| NEO→1YR | LEFT | 8       | 24.70 | 0.60         | 23,-1,-13 | AMYG-L   | 25   | AMYG-L, OLF-L, HIP-L, PAL-L, PHG-L, CAU-L  | -29.04 | 14.60 | -1.99 | 0.049        |
| 1YR→2YR | LEFT | 3       | 5.32  | 0.65         | 35,35,35  | IPL-L    | 32   | IPL-L, PoCG-L                              | -8.57  | 3.07  | -2.79 | <b>0.006</b> |
| NEO→1YR | LEFT | 4       | -5.89 | -0.16        | 51,23,-21 | ITG-L    | 44   | ITG-L, MTG-L                               | -75.31 | 32.95 | -2.29 | 0.024        |

**Group:** neonate (NEO), 1-year (1YR), 2-year (2YR), first year (NEO→1YR), and second year (1YR→2YR). **Seed:** left or right amygdala. **Cluster:** label within group, seed, and sign (from Tables 2-5). **t:** t-statistic at cluster peak. **Z or  $\beta$ :** Fisher's Z-transformed correlation (NEO, 1YR, 2YR) or beta estimate (i.e. log(age) growth term for NEO-1YR, 1YR-2YR) at cluster peak. **XYZ:** spatial coordinates of cluster peak. **Area:** AAL area associated with cluster peak (see Table S2). **Size:** cluster size in voxels. **Coverage:** other AAL areas included in cluster extent. **Behavior:** summary statistics (e: estimate, se: standard error, t: t-statistic, and p: p-value) corresponding to linear relationship between cognitive outcome (4YR-IQ) and cluster-level functional connectivity estimates. Bold p-values indicate  $< 0.01$ .

**Table S10: Summary of network-level brain-behavior relationships.**

| Group   | Seed  | RSN   | 4YR Behavior | e       | se     | t     | p            |
|---------|-------|-------|--------------|---------|--------|-------|--------------|
| 2YR     | LEFT  | CON-L | ISC          | 42.47   | 11.24  | 3.78  | <b>0.000</b> |
| 2YR     | LEFT  | CON-L | IQ           | -50.39  | 16.22  | -3.11 | <b>0.003</b> |
| 1YR→2YR | LEFT  | CON-R | IQ           | -385.12 | 143.30 | -2.69 | <b>0.009</b> |
| 2YR     | RIGHT | CON-R | ISC          | 36.61   | 13.72  | 2.67  | <b>0.010</b> |
| 2YR     | LEFT  | CON-R | IQ           | -45.89  | 17.77  | -2.58 | 0.013        |
| 1YR→2YR | LEFT  | CON-L | IQ           | -47.28  | 20.36  | -2.32 | 0.022        |
| 1YR     | LEFT  | SM    | ISC          | 23.39   | 10.42  | 2.24  | 0.028        |
| 2YR     | RIGHT | CON-L | ISC          | 27.59   | 12.35  | 2.23  | 0.030        |
| 1YR     | RIGHT | Va    | ANX          | -26.69  | 12.44  | -2.15 | 0.036        |
| NEO→1YR | LEFT  | DMN   | ISC          | -29.70  | 14.13  | -2.10 | 0.038        |
| Neo     | LEFT  | SAL   | IQ           | -21.14  | 10.10  | -2.09 | 0.040        |
| 1YR→2YR | LEFT  | DMN   | ANX          | 5.14    | 2.50   | 2.06  | 0.043        |
| 1YR→2YR | LEFT  | SM    | ISC          | -27.07  | 13.19  | -2.05 | 0.043        |
| 2YR     | LEFT  | CON-R | ANX          | -31.61  | 15.30  | -2.07 | 0.044        |
| 1YR→2YR | LEFT  | CON-R | ANX          | -235.00 | 116.10 | -2.02 | 0.046        |

**Group:** neonate (NEO), 1-year (1YR), 2-year (2YR), first year (NEO→1YR), and second year (1YR→2YR). **Seed:** left or right amygdala. **RSN:** resting-state network (see Figure S2). **4YR Behavior:** summary statistics (e: estimate, se: standard error, t: t-statistic, and p: p-value) corresponding to linear relationship between behavioral outcome [parent reported anxiety (ANX), inhibitory self-control (ISC), and cognitive development (IQ)] and network-level functional connectivity estimates. Bold p-values indicate  $< 0.01$ .



## Supplemental References

1. Jenkinson M, Beckmann CF, Behrens TEJ, Woolrich MW, Smith SM (2012): Fsl. *NeuroImage*. 62:782-790.
2. Cox RW (1996): AFNI: software for analysis and visualization of functional magnetic resonance neuroimages. *Computers and biomedical research, an international journal*. 29:162-173.
3. Power JD, Barnes Ka, Snyder AZ, Schlaggar BL, Petersen SE (2012): Spurious but systematic correlations in functional connectivity MRI networks arise from subject motion. *NeuroImage*. 59:2142-2154.
4. Shi F, Yap P-T, Wu G, Jia H, Gilmore JH, Lin W, et al. (2011): Infant brain atlases from neonates to 1- and 2-year-olds. *PloS one*. 6:e18746-e18746.
5. Smith SM, Fox PT, Miller KL, Glahn DC, Fox PM, Mackay CE, et al. (2009): Correspondence of the brain's functional architecture during activation and rest. *Proc Natl Acad Sci U S A*. 106:13040-13045.
6. Vercauteren T, Pennec X, Perchant A, Ayache N (2009): Diffeomorphic demons: Efficient non-parametric image registration. *NeuroImage*. 45:S61-S72.
7. Reynolds C, Kamphaus R (2004): *BASC-2 behavioral assessment system for children manual (2nd ed.)*. . Circle Pines, MN: AGS Publishing.
8. Gioia G, Espy K, Isquith P (2003): *BRIEF-P: Behavior Rating Inventory of Executive Function--preschool Version: Professional Manual*.: Psychological Assessment Resources.
9. Roid C (2003): *Stanford-Binet Intelligence Scales: Fifth Edition*. Ttasca, IL: Riverside Publishing.
